# Supplementary material for: The evolutionally-conserved function of group B1 Sox family members confers the unique role of Sox2 in mouse ES cells
Source: PubMed Central journal article supplement (PMC5007870; doi:10.1186/s12862-016-0755-4), 2016-08-31

**A**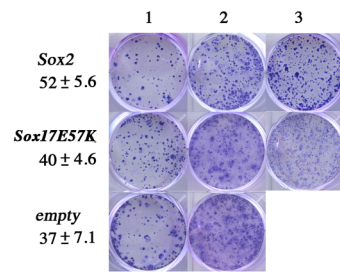**B**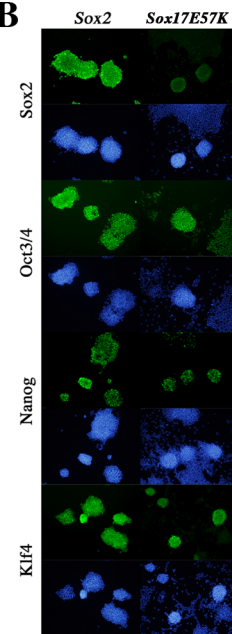**C**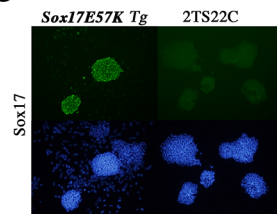

Supplement: 12862_2016_755_MOESM2_ESM.pdf [file 12862_2016_755_MOESM2_ESM.pdf]
