# Supplementary material for: The evolutionally-conserved function of group B1 Sox family members confers the unique role of Sox2 in mouse ES cells
Source: PubMed Central journal article supplement (PMC5007870; doi:10.1186/s12862-016-0755-4), 2016-08-31
Supplement: 12862_2016_755_MOESM3_ESM.pdf [file 12862_2016_755_MOESM3_ESM.pdf]

**Table 1. PCR primers for isolation of Sox genes.**

| Gene                  |   | Sequence                                    |
|-----------------------|---|---------------------------------------------|
| <i>Amphioxus SoxB</i> | F | ATCTCGAGCCACCATGATGGAGACAGCCGTGCACCCGGCCCAG |
|                       | R | ATGCGGCCGCTCACATGTGACTGAGGGAACTGTACC        |
| <i>Ascidian SoxB</i>  | F | AACTTCTCCGTCCTACTCCACC                      |
|                       | R | ACGAACTCCTACATATGCGCAG                      |
| <i>Fly SoxNeuro</i>   | F | AATGTGACCACCATGCTGACCATGGAATCGGATATGAAAG    |
|                       | R | ATGCGGCCGCTCACATGTGTGCCAGCGGCGCCATCGCC      |
| <i>Mouse Sox1</i>     | F | ACTGCAGCCGCCAGATGTACAGCATGATG               |
|                       | R | ACTGCAGCCGCCAGATGTACAGCATGATG               |
| <i>Mouse Sox3</i>     | F | AAGTCGACATAACTTCGTATAG                      |
|                       | R | GCACTAGTTTTAGATGTGGGTCAGCGG                 |
| <i>Mouse Sox4</i>     | F | ATCTCGAGCCACCATGGTACAACAGACC                |
|                       | R | GCACTAGTTCAGTAGGTGAAGACCAGG                 |
| <i>Mouse Sox5</i>     | F | AAAGTCGACTTTTCCAGCATGCTTACTGAC              |
|                       | R | AAGCGGCCGCCCTTATCAGTTGGCTTGTCC              |
| <i>Mouse Sox6</i>     | F | CCTCGAGTAACTAAGAATGTCTTCCAAGCAAG            |
|                       | R | CCGCGGCCGCTCCTCAGTTGGCACTGACAGGCTC          |
| <i>Mouse Sox7</i>     | F | CTCGAGCCACCATGGCCTCGCTGCTG                  |
|                       | R | GCACTAGTTTTATGACACACTGTAGCTG                |
| <i>Mouse Sox8</i>     | F | AAAGTCGACGCGTGGCCCCGATGCTGGACA              |
|                       | R | AAGCGGCCGCCCTCAGGGTCGGGTCAGGGTG             |
| <i>Mouse Sox9</i>     | F | AAAGTCGACGGGCTCGCGTATGAATCTCCT              |
|                       | R | AAGCGGCCGCTTTTCTCTTCTCAGGGTCTG              |
| <i>Mouse Sox11</i>    | F | ATCTCGAGCCACCATGGTGCAGCAGG                  |
|                       | R | GAGCGGCCGCTTCAATACGTGAACACCAG               |
| <i>Mouse Sox13</i>    | F | CCTCGAGCGCTAGCACCATGGTGAACCTGCAC            |
|                       | R | CCGCGGCCGCGGGATCAGTCTGTGAGTACCACCAG         |
| <i>Mouse Sox14</i>    | F | AAAGTCGACGCCGGGACCATGTCCAAACCT              |
|                       | R | AAGCGGCCGCTTGGGGTTACATGGCCGTAG              |
| <i>Mouse Sox15</i>    | F | AAAGTCGACTCCAACCCATGGCGCTGACCA              |

|                    |   |                                  |
|--------------------|---|----------------------------------|
|                    | R | AAGCGGCCGCCAGTTAAAGGTGGGTACTG    |
| <i>Mouse Sox17</i> | F | GTCTCGAGAGCCATGAGCAGCCCGGATG     |
|                    | R | GCACTAGTTTTAAATGTCGGGGTAGTTG     |
| <i>Mouse Sox18</i> | F | AAAGTCGACCAGCTGGAATGCAGAGATCGC   |
|                    | R | AAGCGGCCGCAAGGACAGTGTCTAGCCTGA   |
| <i>Mouse Sox21</i> | F | CCTCGAGGCGACAGCATGTCCAAGCCTGTGG  |
|                    | R | AACTAGTGGGGTCATAGCGCGGCAGCGTAGGC |

---

F: forward primer, R: reverse primer
