# Supplementary material for: The evolutionally-conserved function of group B1 Sox family members confers the unique role of Sox2 in mouse ES cells
Source: PubMed Central journal article supplement (PMC5007870; doi:10.1186/s12862-016-0755-4), 2016-08-31
Supplement: 12862_2016_755_MOESM4_ESM.pdf [file 12862_2016_755_MOESM4_ESM.pdf]

**Table 2. PCR primers for mutagenesis of mouse Sox genes.**

---

| Gene            |   | Sequence                        |
|-----------------|---|---------------------------------|
| <i>Sox2M1</i>   | F | CGTCAAGAGGCCCATGAACGCCTTC       |
|                 | R | TGGTCCGGGCTGTTCTTCTGGTTG        |
| <i>Sox2M2</i>   | F | GGGGGAGCGGCGTAAGATGGCCCAG       |
|                 | R | GGGACCATAACCATGAAGGCGTTCATG     |
| <i>Sox2M3</i>   | F | GGGGGCAGCGGCGTAAGATAGCCCAGGAG   |
|                 | R | GGGACCATAACCATGAAGGCGTTCATG     |
| <i>Sox2M4</i>   | F | CATAACTCGGAGATCAGCAAGCGCCTG     |
|                 | R | CATCTTGGGGTTCTGCTGGGCCATCT      |
| <i>Sox2M5</i>   | F | CATAACTCGGAGATCAGCAAGCGCCTG     |
|                 | R | CATGTCGGGGTTCTCCTGGGCCATCT      |
| <i>Sox2M6</i>   | F | GCTGAAACTTTTGTCCGAGACCGAGA      |
|                 | R | GCTTGCCAGGCGCTTGCTGATCTCCGAG    |
| <i>Sox2M7</i>   | F | GCGCTCTGCACATGAAGGAGCACCC       |
|                 | R | GCAGCCGCTTGGCCTCTTCGATGAACGGC   |
| <i>Sox2M8</i>   | F | GCGCTCTGCACATGAAGGAGCACCC       |
|                 | R | GCAGCCGCTCGGCCTCGTCGATGAACGGC   |
| <i>Sox2M9</i>   | F | GCGCTCAGCACATGAAGGAGCACCC       |
|                 | R | GCAGCCGCTTGGCCTCGTCGATGAACGGC   |
| <i>Sox2M10</i>  | F | GGCGGAAAAAAAAAAGACGCTCATGAAGAAG |
|                 | R | GCGGCCGGTATTTATAATCCGGGTG       |
| <i>Sox17M8R</i> | F | CGTGCAGCATATGCAGGACCACCC        |
|                 | R | CGTAGCCGCTTGGCCTCTTCCACGAAGGG   |

---

F: forward primer, R: reverse primer
